# Supplementary material for: Nanotopographical 3D-Printed Poly(ε-caprolactone) Scaffolds Enhance Proliferation and Osteogenic Differentiation of Urine-Derived Stem Cells for Bone Regeneration
Source: MDPI journal article supplement (doi:10.3390/pharmaceutics14071437), 2022-07-08
Supplement: s1 [file s1]

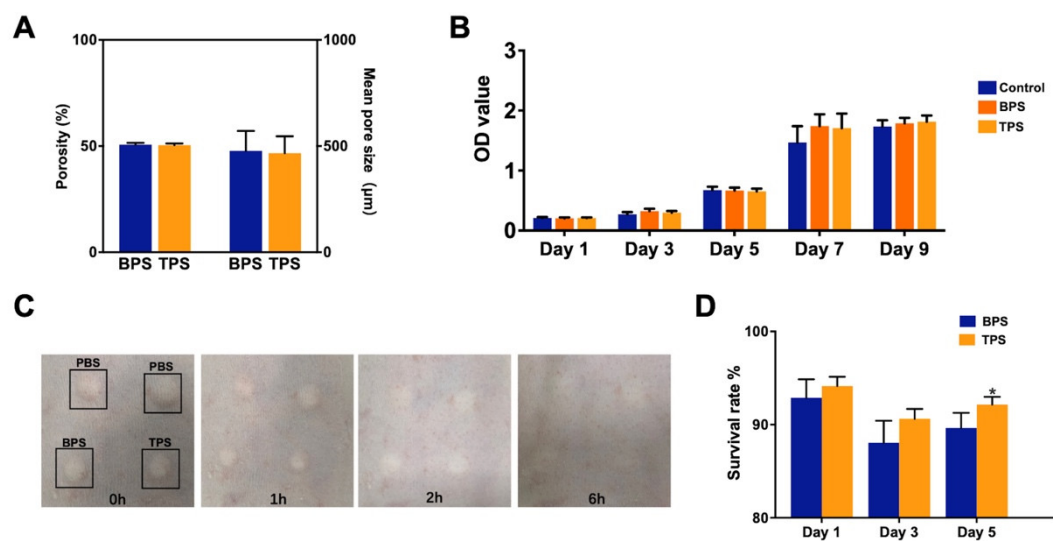

**Figure S1** (A) The porosity and mean pore size of BPS and TPS. (B) Cytotoxicity test of scaffold infiltration medium. (C) Photographs of animals' skin stimulation at 0, 1, 2, and 6 h. (D) The survival rates of USC's on the surface of BPS and TPS. \*  $p < 0.05$ .
